# Supplementary material for: Association of a Single Nucleotide Variant in TERT with Airway Disease in Japanese Rheumatoid Arthritis Patients
Source: MDPI journal article supplement (doi:10.3390/genes14112084), 2023-11-16
Supplement: s1 [file s1]

Supplementary Table S1. Associations of rs2736100 *TERT* and rs1278769 *ATP11A* with the RA subsets.

| <i>TERT</i>      | Dominant model for C |      |             |                      | Recessive model for C |      |             |                      | Codominant model |                      |
|------------------|----------------------|------|-------------|----------------------|-----------------------|------|-------------|----------------------|------------------|----------------------|
| rs2736100        | <i>P</i>             | OR   | 95%CI       | <i>P<sub>c</sub></i> | <i>P</i>              | OR   | 95%CI       | <i>P<sub>c</sub></i> | <i>P</i>         | <i>P<sub>c</sub></i> |
| UIP(+)RA, n (%)  | 0.1091               | 0.69 | (0.44-1.07) | 0.3273               | 0.8641                | 1.04 | (0.53-2.03) | NS                   | 0.1892           | 0.5675               |
| NSIP(+)RA, n (%) | 1.0000               | 1.02 | (0.67-1.55) | NS                   | 0.6378                | 1.14 | (0.63-2.09) | NS                   | 0.8117           | NS                   |
| AD(+)RA, n (%)   | 0.0382               | 1.46 | (1.03-2.06) | 0.1146               | 0.0074                | 1.84 | (1.18-2.86) | 0.0222               | 0.0042           | 0.0127               |
| CLD(-)RA, n (%)  |                      |      |             |                      |                       |      |             |                      |                  |                      |

  

| <i>ATP11A</i>    | Dominant model for G |      |             |        | Recessive model for G |      |             |                      | Codominant model |                      |
|------------------|----------------------|------|-------------|--------|-----------------------|------|-------------|----------------------|------------------|----------------------|
| rs1278769        | <i>P</i>             | OR   | 95%CI       |        | <i>P</i>              | OR   | 95%CI       | <i>P<sub>c</sub></i> | <i>P</i>         | <i>P<sub>c</sub></i> |
| UIP(+)RA, n (%)  | 1.0000               | 1.06 | (0.53-2.13) | NS     | 0.4330                | 0.83 | (0.53-1.28) | NS                   | 0.5035           | NS                   |
| NSIP(+)RA, n (%) | 0.6297               | 1.21 | (0.62-2.35) | NS     | 0.0229                | 1.62 | (1.07-2.46) | 0.0687               | 0.0347           | 0.1042               |
| AD(+)RA, n (%)   | 0.0572               | 1.77 | (0.98-3.19) | 0.1716 | 0.8694                | 1.03 | (0.75-1.43) | NS                   | 0.4682           | NS                   |
| CLD(-)RA, n (%)  |                      |      |             |        |                       |      |             |                      |                  |                      |

RA: rheumatoid arthritis, UIP: usual interstitial pneumonia, NSIP: nonspecific interstitial pneumonia, AD: airway disease, CLD: chronic lung disease, OR: odds ratio, CI: confidence interval. Associations were tested by Fisher's exact test using  $2 \times 2$  contingency tables for dominant or recessive models or Cochran-Armitage test for codominant model.
