# Supplementary material for: Association of a Single Nucleotide Variant in TERT with Airway Disease in Japanese Rheumatoid Arthritis Patients
Source: MDPI journal article supplement (doi:10.3390/genes14112084), 2023-11-16
Supplement: s1 [file s1]

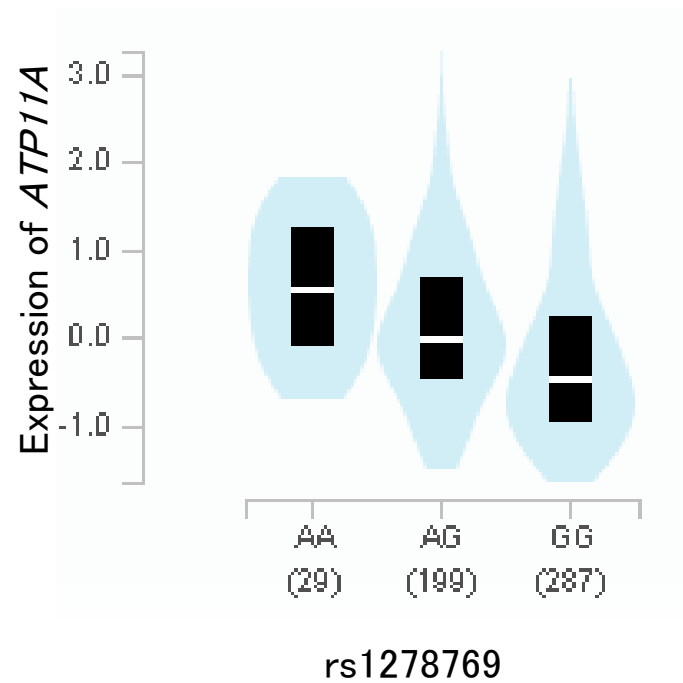

**Supplementary Figure S1. An association of rs1278769G with low expression levels of the *ATP11A* gene in the lung.** Expression quantitative trait loci analysis in the Genotype–Tissue Expression portal database (<https://gtexportal.org/home/snp/rs1278769>) showed an association of rs1278769G with low expression levels of *ATP11A* in the lung ( $P=5.0 \times 10^{-11}$ ).
